# Supplementary material for: Single-cell analysis reveals context-dependent, cell-level selection of mtDNA
Source: PubMed Central journal article supplement (PMC11078733; doi:10.1038/s41586-024-07332-0), 2024-04-24
Supplement: 41586_2024_7332_MOESM1_ESM.pdf [file 41586_2024_7332_MOESM1_ESM.pdf]

## Supplementary information

---

# Single-cell analysis reveals context-dependent, cell-level selection of mtDNA

---

In the format provided by the authors and unedited

# Supplementary Information

Supplement to: Kotrys AV, Durham TJ, Guo XA, Vantaku VR, Parangi S, Mootha VK  
*Single-cell analysis reveals context-dependent, cell-level selection of mtDNA*

Page number:

|                                                                                |    |
|--------------------------------------------------------------------------------|----|
| <b>SUPPLEMENTARY DISCUSSION</b> .....                                          | 2  |
| HETEROTYPIC AND HOMOTYPIC DOUBLETS IN SCI-LITE.....                            | 2  |
| LIMITATIONS OF THE STUDY.....                                                  | 3  |
| <b>SUPPLEMENTARY FIGURES</b> .....                                             | 5  |
| SUPPLEMENTARY FIGURE 1.....                                                    | 5  |
| SUPPLEMENTARY FIGURE 2.....                                                    | 6  |
| SUPPLEMENTARY FIGURE 3.....                                                    | 7  |
| <b>SUPPLEMENTARY SEQUENCES</b> .....                                           | 8  |
| AMINO ACID SEQUENCE OF THE RIGHT TALE OF SILENT DDCBE .....                    | 8  |
| AMINO ACID SEQUENCE OF THE LEFT TALE OF SILENT DDCBE .....                     | 8  |
| <b>SUPPLEMENTARY TABLES</b> .....                                              | 9  |
| TABLE S1. SCI-LITE OLIGONUCLEOTIDES .....                                      | 9  |
| TABLE S2. REAGENTS.....                                                        | 9  |
| TABLE S3. PRIMERS USED FOR SANGER SEQUENCING, RT-QPCR AND AMPLICON LIBRARIES.. | 10 |
| <b>SUPPLEMENTARY REFERENCES</b> .....                                          | 11 |

## Supplementary discussion

### *Heterotypic and homotypic doublets in SCI-LITE*

During sequential split-pool rounds of SCI-LITE, it's possible that two cells will traverse the same path by random chance. This theoretical "collision rate," or "doublet rate," can be estimated based on the total number of barcode combinations and the number of cells in the experiment<sup>22</sup>. The estimated collision rate includes both heterotypic doublets (cells from two different cell lines that traveled together) and homotypic doublets (cells from the same cell line that traveled together). To experimentally assess doublet rates in our "barnyard experiment," in addition to mixing HeLa and 293T cells, we also analyzed each cell line separately, wherein each cell line was barcoded with predefined set of RT barcodes that we then used to unambiguously assign reads to either cell line. In such an experiment we should not observe heterotypic doublets consisting of mixed HeLa and 293T reads, as both cell lines are physically separated during the initial RT step. We found that the cells in these non-mixed arms of the experiment had no more than 29 UMIs per cell from the other cell type detected, and we set this as our threshold for calling heterotypic doublets in the mixed arm of the experiment. With this threshold, we identified 6 heterotypic doublets in our population of 748 mixed HeLa and 293T cells (a rate of ~0.8%). Based on our 2% theoretical collision rate, we would expect ~1.2% of reads to represent homotypic doublets. Homotypic doublets are of course harder to identify, because the colliding cells have the same allele. Many single-cell analysis pipelines assume that doublet cells should have higher UMI coverage than singlets because they have twice the genetic content, and thus filter out the cells with the highest UMI coverage as probable homotypic doublets. However, when we compared the coverage of our heterotypic doublets to the overall UMI count distribution, we found that they were generally not at the extreme end of the distribution. Hence, a simple UMI count filter would remove many true singlets. Since our expected homotypic doublet rate is so low, we chose not to implement a coverage-based filter to remove doublets in our analysis pipeline. In general, we cannot confidently identify doublets outside of the barnyard SCI-LITE experiment, because in our other experiments all cells are expected to have the

same alleles but at variable heteroplasmy levels. Reassuringly, the barnyard experiment shows that our doublet rate is low and consistent with our expected rate of about 2%.

### *Limitations of the study*

We acknowledge several limitations of this study.

First, SCI-LITE is designed for targeted analysis of selected transcripts, and therefore it requires optimization for each new target (e.g., mtDNA heteroplasmy of interest, etc.) analogous to how qPCR is typically optimized for each target.

Second, while we find that SCI-LITE results in generating reliable data supported by bulk heteroplasmy estimates, we nonetheless observed a small degree of cross-contamination between analyzed samples that arise in a few specific ways. First, two cells can take the same path through the pooling-and-splitting steps and manifest as a doublet cell in the data analysis as described above. In all experiments we report here, we were able to minimize the impact of doublets on our experimental results in two ways 1) by using a sufficient diversity of barcodes to attain a theoretical doublet rate of no more than 2%, and 2) assigning specific RT barcode sequences to specific samples, which makes heterotypic doublets far less likely. A second form of cross-contamination is when the same UMI is associated with different mtDNA variants. We observed that such cross-contamination events are more probable when more PCR cycles are used to amplify the libraries. We therefore recommend keeping PCR cycles to minimum while amplifying SCI-LITE libraries. We also developed and applied a computational correction - described in detail in the Methods section - that can help correct this kind of cross-contamination and assign the correct allele to each UMI. A third, very minor source of cross-contamination (often just a single UMI per cell if it is present) is due to ambient RNA, which comes from UMIs generated by RNA molecules that leak into the solution, probably from damaged or dying cells<sup>45</sup>, and that then pass through the same combination of wells in the pooling-and-splitting process as a valid cell (Supplementary Fig. 1).

Third, we have used DdCBE to model mtDNA heteroplasmy primarily in immortalized cell lines. While models of mtDNA disease have largely been lacking thus far, the advent of mtDNA base editing now makes it possible to generate primary cell models or animal models to further validate our results.

Fourth, our *in vivo* tumor xenograft model supports the importance of environment-dependent selection of mtDNA heteroplasmy that we observed in cultured cells, but deeper understanding of the mechanism requires further study. In our *in vivo* tumor model showing that the introduced complex I truncating mtDNA heteroplasmy confers a growth benefit to the tumor we used a thyroid follicular cell line (Nthy-ori 3-1) that has been immortalized with a single copy of the SV40 T antigen plasmid<sup>33</sup>. In recent analysis, missense variants in KMT2A, POLE and CHEK2 were identified in this cell line<sup>34</sup>. All of these variants have unspecified functional effects, but none of them are known to be drivers of tumorigenesis in Hürtle cell carcinomas<sup>8,46</sup>. Future studies are required to determine whether the introduced complex I mutation is required transiently or long-term in the tumor, and what advantage it confers to the cells for promoting tumor growth.

# Supplementary figures

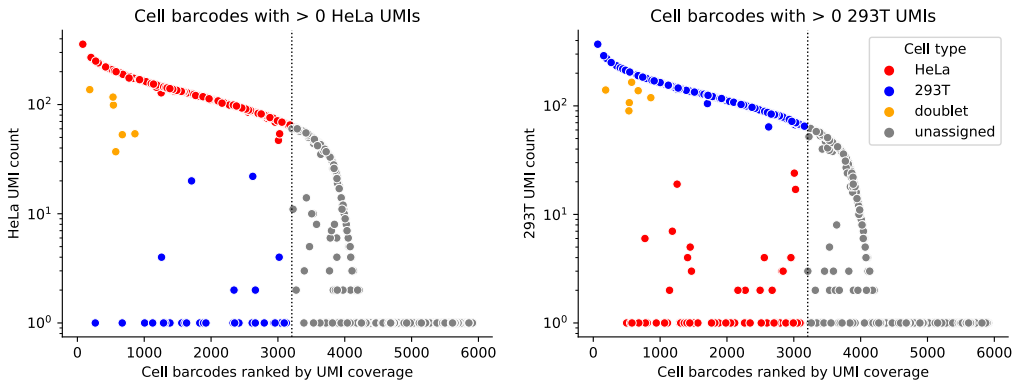

## Supplementary Figure 1.

Low levels of ambient RNA contamination are present in SCI-LITE data, as shown in this analysis of the HeLa (a) and 293T (b) cells from the barnyard experiment (Fig.1 c-e). Ideally, HeLa cells would contain only HeLa alleles and 293T would contain only 292T alleles. We observed that some HeLa cells contain a low level of alternate 293T allele, and some 293T cells contain alternate HeLa allele. Most of the non-doublet cells with alternate alleles detected have just a single contaminating UMI, note that the y-axis is on a log scale.

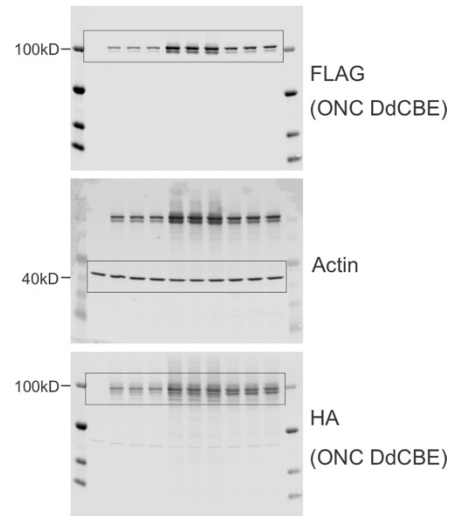

**Supplementary Figure 2.**

**a,** Uncropped western blot images. From Main Fig. 2b and Extended Data Fig. 2a.

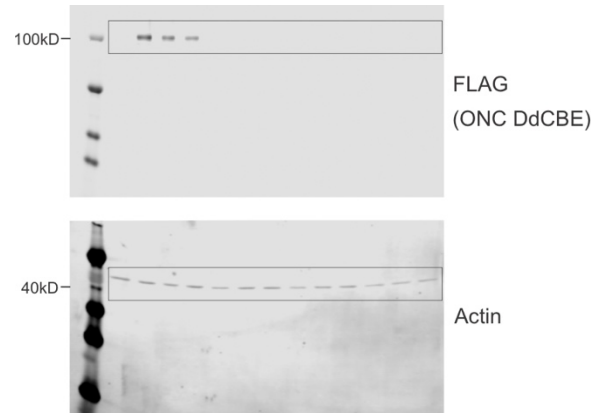

**Supplementary Figure 3.**  
**a,** Uncropped western blot images from Extended Data Fig. 9c.



## Supplementary sequences

*Amino acid sequence of the right TALE of SILENT DdCBEs*

MDIADLRTLGYSSQQQEKIKPKVVRSTVAQHHEALVGHGFTHAHIVALSQHPAALGTVA  
VKYQDMIAALPEATHEAIVGVGKQWSGARALEALLTVAGELRGPPLQLDTGQLLKIAGR  
GGVTAVEAVHAWRNALTGAPLNLTPQVVAIASNNGGKQALETVQALLPVLCQAHGLT  
PQQVVAIASNNGGKQALETVQRLLPVLCQAHGLTPQQVVAIASNNGGKQALETVQRLL  
PVLCQAHGLTPEQVVAIASHDGGKQALETVQALLPVLCQAHGLTPEQVVAIASNNGGK  
QALETVQALLPVLCQAHGLTPEQVVAIASNIGGKQALETVQALLPVLCQAHGLTPEQVV  
AIASNNGGKQALETVQRLLPVLCQAHGLTPEQVVAIASNNGGKQALETVQALLPVLCQ  
AHGLTPQQVVAIASNIGGKQALETVQRLLPVLCQAHGLTPEQVVAIASNNGGKQALET  
VQRLLPVLCQAHGLTPQQVVAIASNNGGKQALETVQRLLPVLCQAHGLTPQQVVAIAS  
NIGGKQALETVQRLLPVLCQAHGLTPQQVVAIASNNGGRPALESIVAQLSRPDPALAAL  
TNDHLVALACLGGRPALDAVKKGLG

*Amino acid sequence of the left TALE of SILENT DdCBEs*

MDIADLRTLGYSSQQQEKIKPKVVRSTVAQHHEALVGHGFTHAHIVALSQHPAALGTVA  
VKYQDMIAALPEATHEAIVGVGKQWSGARALEALLTVAGELRGPPLQLDTGQLLKIAGR  
GGVTAVEAVHAWRNALTGAPLNLTPQVVAIASNNGGKQALETVQALLPVLCQAHGLT  
PQQVVAIASNIGGKQALETVQRLLPVLCQAHGLTPQQVVAIASNIGGKQALETVQRLLP  
VLCQAHGLTPEQVVAIASNNGGKQALETVQALLPVLCQAHGLTPEQVVAIASHDGGKQ  
ALETVQALLPVLCQAHGLTPEQVVAIASNNGGKQALETVQALLPVLCQAHGLTPEQVV  
AIASNNGGKQALETVQRLLPVLCQAHGLTPEQVVAIASHDGGKQALETVQALLPVLCQ  
AHGLTPQQVVAIASNIGGKQALETVQRLLPVLCQAHGLTPQQVVAIASHDGGGRPALES  
IVAQLSRPDPALAALTNDHLVALACLGGRPALDAVKKGLG

## Supplementary tables

**Table S1. SCI-LITE oligonucleotides.** Table S1 is provided as a separate file.

**Table S2. Reagents.**

| Reagent                                                     | Source                   | Identifier  |
|-------------------------------------------------------------|--------------------------|-------------|
| <b>Antibodies</b>                                           |                          |             |
| Mouse anti-FLAG (primary)                                   | Sigma                    | F1804       |
| Mouse anti-HA (primary)                                     | Biologend                | 901513      |
| Rabbit anti-Actin (primary)                                 | Cell Signaling           | 4970S       |
| Goat anti-rabbit 680RD (secondary)                          | LI-COR                   | 926-68071   |
| Goat anti-mouse 800CW (secondary)                           | LI-COR                   | 926-32210   |
| <b>Chemicals</b>                                            |                          |             |
| DMEM, high glucose, pyruvate                                | GIBCO                    | 11995065    |
| Sodium Pyruvate                                             | GIBCO                    | 11360070    |
| Fetal Bovine Serum                                          | GIBCO                    | 26140079    |
| Fetal Bovine Serum, dialyzed                                | GIBCO                    | 26400044    |
| DMEM, no glucose                                            | GIBCO                    | 11966025    |
| D-(+)-Glucose                                               | Sigma                    | G7021       |
| D-(+)-Galactose                                             | Sigma                    | G5388       |
| Uridine                                                     | Sigma                    | U3750       |
| Oligomycin A                                                | Sigma                    | 75351       |
| Seahorse XF DMEM Medium pH 7.4                              | Agilent                  | 103575-100  |
| Glucose solution for Seahorse assay                         | Agilent                  | 103577-100  |
| L-glutamine                                                 | GIBCO                    | 25030-081   |
| Piericidin A                                                | Cayman Chemical          | 15379       |
| Antimycin A                                                 | Sigma                    | A8674       |
| Carbonyl cyanide-4-(trifluoromethoxy)phenylhydrazone (FCCP) | Sigma                    | C2920       |
| PBS                                                         | Life Technologies        | 10010049    |
| UltraPure DNase/RNase-Free Distilled Water                  | Invitrogen               | 10977023    |
| Blocking buffer                                             | LI-COR                   | 927-70050   |
| GelGreen Nucleic Acid Stain                                 | Sigma                    | SCT125      |
| RIPA buffer                                                 | Boston BioProducts       | BP-115      |
| cOmplete Protease Inhibitor Cocktail                        | Roche                    | 11697498001 |
| Laemmli SDS-Sample Buffer                                   | Boston BioProducts       | BP-111R     |
| Tris-glycine running buffer                                 | BioRad                   | 1610732     |
| Blotting-Grade Blocker                                      | BioRad                   | 170-6404    |
| Poly-L-lysine hydrobromide                                  | Sigma                    | P6282       |
| Hoechst 33342 Solution                                      | Thermo Fisher Scientific | H3570       |
| AMPure XP beads                                             | Beckman Coulter          | A63881      |
| Bovine serum albumin                                        | Sigma                    | A3294       |
| Lipofectamine 2000 reagent                                  | Invitrogen               | 11668       |
| iQ SYBR Green Supermix                                      | Bio-Rad                  | 1708880     |
| <b>Commercial assays</b>                                    |                          |             |
| QIAquick PCR Purification Kit                               | Qiagen                   | 28104       |
| DNeasy Blood & Tissue Kit                                   | Qiagen                   | 69506       |

|                                                                             |                           |             |
|-----------------------------------------------------------------------------|---------------------------|-------------|
| QIAquick Gel Extraction Kit                                                 | Qiagen                    | 28704       |
| RNeasy Mini Kit                                                             | Qiagen                    | 74106       |
| Phusion Hot Start II High-Fidelity PCR Master Mix                           | Thermo Fisher Scientific  | F565L       |
| Trans-Blot Turbo Midi 0.2 µm Nitrocellulose Transfer Packs                  | BioRad                    | 1704159     |
| Novex WedgeWell 4 to 20%, Tris-Glycine, 1.0 mm, 15 wells, Mini Protein Gels | Invitrogen                | XP04205BOX  |
| GeneRuler Low Range DNA Ladder                                              | Thermo Fisher Scientific  | SM1193      |
| SuperScript IV Reverse Transcriptase                                        | Invitrogen                | 18090010    |
| ezDNase Enzyme                                                              | Invitrogen                | 11766051    |
| Qubit dsDNA HS Assay Kit                                                    | Thermo Fisher Scientific  | Q32851      |
| NEBNext Library Quant Kit for Illumina                                      | New England Biolabs       | E7630S      |
| MiSeq Reagent Kit v2, 50 cycles                                             | Illumina                  | MS-102-2001 |
| MiSeq Reagent Kit v3, 150 cycles                                            | Illumina                  | MS-102-3001 |
| PhiX Control v3 Library                                                     | Illumina                  | FC-110-3001 |
| <b>Cell lines</b>                                                           |                           |             |
| 293T                                                                        | ATCC                      | CRL-3216    |
| HeLa                                                                        | ATCC                      | CCL-2       |
| K562                                                                        | ATCC                      | CRL-243     |
| Nthy-ori 3-1                                                                | ECACC                     | 90011609    |
| <b>Recombinant DNA</b>                                                      |                           |             |
| DdCBE installing truncating mt-ND4 mutation, right side TALE                | Addgene                   | #157843     |
| DdCBE installing truncating mt-ND4 mutation, left side TALE                 | Addgene                   | #157844     |
| DdCBE installing LHON-associated mt-ND4 mutation, right side TALE           | Addgene                   | #179686     |
| DdCBE installing LHON-associated mt-ND4 mutation, left side TALE            | Addgene                   | #179682     |
| DdCBE installing SILENT mt-ND4 mutation, right side TALE                    | Liu lab / Broad Institute |             |
| DdCBE installing SILENT mt-ND4 mutation, left side TALE                     | Liu lab / Broad Institute |             |

**Table S3. Primers used for Sanger sequencing, RT-qPCR and amplicon libraries.**

| Gene         | Sequence                                                  |                                                           | Application                  |
|--------------|-----------------------------------------------------------|-----------------------------------------------------------|------------------------------|
|              | Forward primer                                            | Reverse primer                                            |                              |
| MT-ND4 (SNP) | GCAAACCTCAAACCTACGAACGC                                   | AGGTGTATGAACATGAGG                                        | PCR and Sanger               |
| MT-ND4 (ONC) | TCGTCGGCAGCGTCAGATGTGTATAAGAGACAG<br>GAACTCTCTGTGCTAGTAAC | GTCTCGTGGGCTCGGAGATGTGTATAAGAGACAG<br>CGTAAGCCTCTGTTGTCAG | DNA amplicon libraries, PCR1 |

|                         |                                                           |                                                              |                                       |
|-------------------------|-----------------------------------------------------------|--------------------------------------------------------------|---------------------------------------|
| MT-ND4<br>(LHON/SILENT) | TCGTCGGCAGCGTCAGATGTGTATAAGAGACAG<br>GCCATTCTCATCAAACC    | GTCTCGTGGGCTCGGAGATGTGTATAAGAGACAG<br>GTATGTTGAGTCCTGTAAGTAG | DNA<br>amplicon<br>libraries,<br>PCR1 |
| MT-ND4<br>(LHON/SILENT) | TCGTCGGCAGCGTCAGATGTGTATAAGAGACAG<br>GCCATTCTCATCAAACC    | GTCTCGTGGGCTCGGAGATGTGTATAAGAGACAG<br>CAGACGTGTGCTCTTCCGA    | RNA<br>amplicon<br>libraries,<br>PCR1 |
| MT-ND4                  | CAGACGTGTGCTCTTCCGANNNNNNNNNgtatggtgagtcctgtaagt          |                                                              | Target-<br>specific RT<br>primer      |
| MT-ND4                  | TCGTCGGCAGCGTCAGATGTGTATAAGAGACAG<br>TCTCTGTGCTAGTAACCACG |                                                              | RT-qPCR                               |

Marked in red are Illumina partial adapter sequences.

**Supplementary references**

45. Janssen, P. et al. The effect of background noise and its removal on the analysis of single-cell expression data. *Genome Biology* 24, 140 (2023).

46. Gopal, R. K. et al. Effectors Enabling Adaptation to Mitochondrial Complex I Loss in Hürthle Cell Carcinoma. *Cancer Discov* 13, 1904–1921 (2023).
