# Supplementary material for: Single-cell analysis reveals context-dependent, cell-level selection of mtDNA
Source: PubMed Central journal article supplement (PMC11078733; doi:10.1038/s41586-024-07332-0), 2024-04-24
Supplement: 41586_2024_7332_MOESM3_ESM.pdf [file 41586_2024_7332_MOESM3_ESM.pdf]

## SCI-LITE detailed workflow

Supplement to: Kotrys AV, Durham TJ, Guo XA, Vantaku VR, Parangi S, Mootha VK

### *Single-cell analysis reveals context-dependent, cell-level selection of mtDNA*

SCI-LITE (Single-cell Combinatorial Indexing Leveraged to Interrogate Targeted Expression) is a high throughput sequencing technique that enables profiling selected transcripts in millions of single cells. We harnessed combinatorial indexing (Rosenberg et al., Science, 2018, Cao et al., Nature, 2019) to develop a high-throughput, scalable and cost-effective tool for investigating mitochondrial DNA (mtDNA) heteroplasmy in single cells.

#### Workflow overview

1. Collecting and fixing cells
2. Permeabilization
3. Indexed reverse transcription
4. Indexed ligation
5. Lysis
6. Nested PCR
7. Indexed PCR
8. Library purification

#### Buffers

- Fixing buffer: 4% v/v formaldehyde in PBS (make fresh)
- Quenching buffer: 1M Tris-HCl pH 8.0
- Permeabilization buffer: 100 mM Tris-HCl pH 7.4, 150 mM NaCl, 3 mM MgCl<sub>2</sub>, 0.2 mg ml<sup>-1</sup> BSA, 0.1% v/v NP-40
- Cell buffer (CB): 100 mM Tris-HCl pH 7.4, 100 mM NaCl, 3 mM MgCl<sub>2</sub>
- Cell buffer with BSA (CBB): 100 mM Tris-HCl pH 7.4, 100 mM NaCl, 3 mM MgCl<sub>2</sub>, 0.2 mg ml<sup>-1</sup> BSA

Filter all buffers and store at 4°C. Before use add SUPERaseIn RNase inhibitor (final 200 U/ml), store on ice.

#### Preparation of indexing plates

- RT plates: To each well of a 96-well plate add 2 µl of 10 mM dNTP and 2 µl of 100 µM barcoded RT primers. Plates can be prepared in advance and stored at -20°C.
- Ligation plates: To each well of a 96-well plate add 1.1 µl of 100 µM linker strand, 1.2 µl of 100 µM barcoded ligation oligo and 7.7 µl of oligo buffer (50 mM Tris-HCl pH 7.6, 50 mM NaCl). Seal plates and heat to 95°C for 2 min and cool down to 20°C at a rate of -0.1°C s<sup>-1</sup>. Plates can be prepared in advance and stored at 4°C.
- Blocking strands: Prepare 26.4 µM blocking strands in 1 X T4 ligase buffer. Prepare 10 µl of blocking strand solution per well.

#### Collision rate calculation

We use collision rate estimation from Ma et al., Cell, 2020. The expected number of collisions for N cells with the total number of barcode combination D is:  $N \cdot D + D \cdot ((D-1)/D)^N$ . For example, using 96 indexes per each barcoding rounds results in  $96 \times 96 \times 96 = 884,736$  combinations. With 40,000 cells used for sequencing, the number of collisions is  $40000 - 884736 + 884736 \times ((884736 - 1) / 884736)^{40000} = 890,73$ . The estimated collision rate is  $890,73 / 40000 = 2.23\%$ .

### Detailed protocol

#### 1. Collecting and fixing cells

- a) If working with adherent cells aspirate media, wash cells with PBS and trypsinize.
- b) Move detached cells to 50 ml conical Falcon tubes and centrifuge 400 x g, 3 min at 4°C.
- c) Remove supernatant and wash cells with PBS, centrifuge 400 x g, 3 min at 4°C.
- d) Resuspend cells in 1 ml PBS and transfer to 2 ml round bottom LoBind tubes.
- e) Centrifuge 400 x g, 3 min at 4°C and remove supernatant.
- f) Add 0.25 ml fixing buffer, mix by pipetting, and incubate on ice for 10 min.
- g) Add quenching buffer to a final concentration of 125 mM, mix by pipetting and incubate on ice for 5 min.
- h) Centrifuge 500 x g, 3 min at 4°C.

#### 2. Permeabilization

- a) Remove supernatant and add 0.25 ml permeabilization buffer, mix by pipetting and incubate on ice for 3 min.
- b) Centrifuge 500 x g, 3 min at 4°C, remove supernatant and wash with 0.25 ml CBB.
- c) Centrifuge 600 x g, 2 min at 4°C, remove supernatant and resuspend cells in 2.25 ml CB.

#### 3. Indexed reverse transcription

- a) Remove prepared RT plates from the freezer and let thaw completely.
- b) Add 22 µl cell suspension per well, mix 5 times up and down.
- c) Incubate the plate at 55 °C for 5 min. Immediately place on ice.
- d) Add 14 µl RT mix per well, mix 5 times up and down and start RT reaction.
- e) Add 60 µl CBB to each well and pool cells from all wells into the 5 ml Lo-bind eppendorf tube or sterile reagent reservoir.
- f) Centrifuge cells 600 x g, 2 min at 4°C, remove supernatant and wash cells with 0.5 ml CBB.
- g) Use cells directly for ligation or store at 4°C (**STOPPING POINT**).

| RT MIX                                      | (µl) |
|---------------------------------------------|------|
| 5 X Superscript IV First-Strand Buffer      | 8.0  |
| DTT                                         | 2.0  |
| SuperScript IV reverse transcriptase        | 1.5  |
| RNaseOUT Recombinant Ribonuclease Inhibitor | 1.5  |
| H2O                                         | 1.0  |
| total vol                                   | 14   |

| RT Reaction |      |
|-------------|------|
| Time        | Temp |
|             |      |

|       |    |
|-------|----|
| 02:00 | 4  |
| 02:00 | 10 |
| 02:00 | 20 |
| 02:00 | 30 |
| 02:00 | 40 |
| 05:00 | 50 |
| 07:00 | 55 |
| hold  | 12 |

#### 4. Indexed ligation

- a) Remove supernatant and resuspend cells in 1.9 ml of 1 X NEBuffer 3.1.
- b) Add 1.9 ml of ligation mix and mix by pipetting, use 5 ml Lo-bind eppendorf tube or sterile reagent reservoir.
- c) Add 40  $\mu$ l cell suspension per well of prepared ligation plate, mix 5 times up and down.
- d) Incubate the plate at 37 °C for 30 min.
- e) Add 10  $\mu$ l blocking strands per well, mix 5 times up and down and incubate the plate at 37 °C for 30 min.
- f) Add 40  $\mu$ l CBB to each well and pool cells from all wells into the 5 ml Lo-bind eppendorf tube or sterile reagent reservoir.
- g) Centrifuge cells 600 x g, 2 min at 4°C, remove supernatant and wash cells twice with 0.5 ml CBB, repeat centrifugation step.
- h) Resuspend cells in 0.5 ml CBB and use 10  $\mu$ l of cell suspension for counting with the use of Neubauer cell counting chamber.
- i) Dilute cell suspension in CBB buffer to desired concentration chosen based on the calculated collision rate (when using 96x96x96 barcodes resuspend cells to the final concentration of 104,167 cells ml<sup>-1</sup>)

| Ligation MIX            | ( $\mu$ l) |
|-------------------------|------------|
| 10 X T4 ligase buffer   | 5.0        |
| T4 DNA ligase (120U/uL) | 3.0        |
| H2O                     | 14.0       |
| total vol               | 22.0       |

#### 5. Lysis

- a) Add 10  $\mu$ l of DNA extraction solution per well of 96 wells plate.
- b) Add 4  $\mu$ l of cell suspension per well containing DNA extract solution and mix by pipetting.
- c) Incubate the plate at 65°C for 45 min followed by incubation at 98°C for 5 min.
- d) Use lysates directly for PCR or store at 4°C (**STOPPING POINT**).

#### 6. Nested PCR

- a) Prepare nested PCR mix and add 8  $\mu$ l per well of 96 wells plate.
- b) Add 2  $\mu$ l of lysate per well, seal plate, vortex briefly and spin plate 900 x g, 2 min at RT.
- c) Start nested PCR reaction.
- e) After the reaction is finished, perform purification of PCR products using AMPure XP beads. Use 1.1 X beads per 1 X reaction volume. Follow manufacturer's protocol. Perform elution in 12  $\mu$ l of sterile water (**STOPPING POINT**).

| Nested PCR MIX                                    | ( $\mu$ l) |
|---------------------------------------------------|------------|
| Phusion Hot Start II High-Fidelity PCR Master Mix | 5.00       |
| Forward primer (10 $\mu$ M)                       | 0.25       |
| Reverse primer (10 $\mu$ M)                       | 0.25       |
| H2O                                               | 2.50       |
| total vol                                         | 10.00      |

PCR thermal profile:

| Program         | Time  | Temp | Cycles                               |
|-----------------|-------|------|--------------------------------------|
| Pre-incubation  |       |      | 1                                    |
|                 | 00:30 | 98   |                                      |
| Amplification   |       |      | (determine number of cycles by qPCR) |
|                 | 00:10 | 98   |                                      |
|                 | 00:30 | 56   |                                      |
|                 | 00:30 | 72   |                                      |
| Final extension |       |      | 1                                    |
|                 | 07:00 | 72   |                                      |
| Cooling         |       |      | 1                                    |
|                 |       | 4    |                                      |

## 7. Indexed PCR

- Prepare indexed PCR mix and add 8  $\mu$ l per well of 96 wells plate.
- Add 2  $\mu$ l of purified nested PCR, seal plate, vortex briefly and spin plate 900 x g, 2 min at RT.
- Start indexed PCR reaction.

| Indexed PCR MIX                                   | ( $\mu$ l) |
|---------------------------------------------------|------------|
| Phusion Hot Start II High-Fidelity PCR Master Mix | 5.00       |
| Illumina i5 Index                                 | 0.25       |
| Illumina i7 Index                                 | 0.25       |
| H2O                                               | 2.50       |
| total vol                                         | 10.00      |

PCR thermal profile:

| Program         | Time  | Temp | Cycles                               |
|-----------------|-------|------|--------------------------------------|
| Pre-incubation  |       |      | 1                                    |
|                 | 00:30 | 98   |                                      |
| Amplification   |       |      | (determine number of cycles by qPCR) |
|                 | 00:10 | 98   |                                      |
|                 | 00:30 | 58   |                                      |
|                 | 00:30 | 72   |                                      |
| Final extension |       |      | 1                                    |

|         |       |    |   |
|---------|-------|----|---|
|         | 07:00 | 72 |   |
| Cooling |       |    | 1 |
|         |       | 4  |   |

## 8. Library purification

- Pool PCR products from all wells and resolve in 1.5% agarose gel in TBE with GelGreen.
- Cut out the bands from the gel corresponding to the library size and purify using QIAquick Gel Extraction Kit. Elute product in 60  $\mu$ l of sterile water (**STOPPING POINT**).
- Measure library concentration: use Qubit for estimated library concentration, perform qPCR using NEBNext Library Quant Kit for Illumina for detailed library concentration assessment (**STOPPING POINT**).
- Dilute libraries and sequence using the Illumina MiSeq or NextSeq system. Read configuration depends on the analyzed variants. Exemplary read configuration for ONC heteroplasmy: Read 1: 50 cycles, Read 2: 100 cycles, Index reads: 8 cycles. If not using primers with heterogeneity spacer we recommend sequencing SCI-LITE libraries at the 8 pM concentration with addition of 20% PhiX spike-in. If primers with heterogeneity spacer are used, we recommend sequencing SCI-LITE libraries at the 12 pM concentration, without addition of PhiX spike-in.

### Equipment and consumables:

- Ice buckets
- Freezer and refrigerator
- Refrigerated microcentrifuge that holds 1.5 ml tubes (for example Eppendorf, 5424R)
- Refrigerated multifuge that holds 50 ml tubes and 96-well plates (for example Beckman Coulter, Allegra X-15R)
- PCR machine (for example Bio-Rad, C1000 Touch Thermal Cycler)
- qPCR machine (for example Bio-Rad, CFX Opus 384 Real-Time PCR System)
- MiSeq / NextSeq platform (Illumina)
- Chemical fume hood
- Single and multi-channel pipettes
- Wide orifice pipette tips
- 50 ml Falcon tubes
- 2 ml and 5 ml LoBind conical tubes (VWR International, 80077-234)
- 96-well LoBind plates (VWR International, 76204-386)
- Sterile reagent reservoirs (VWR International, 89094-662)
- Clear adhesive seals (Applied Biosystems, 4306311)
- Neubauer cell counting chamber (for example Sigma BR717820)

### Reagents and chemicals:

| Reagent                                     | Source              | Identifier |
|---------------------------------------------|---------------------|------------|
| SuperScript IV Reverse Transcriptase        | Life Technologies   | 18090050   |
| T4 DNA ligase                               | New England Biolabs | M0202L     |
| RNaseOUT Recombinant Ribonuclease Inhibitor | Invitrogen          | 10777019   |
| SUPERase•In RNase Inhibitor                 | Invitrogen          | AM2696     |
| 16% Formaldehyde (w/v), Methanol-free       | Pierce              | 28906      |
| dNTP mix                                    | New England Biolabs | N0447L     |

|                                                   |                     |             |
|---------------------------------------------------|---------------------|-------------|
| BSA, Molecular Biology Grade                      | New England Biolabs | B9000S      |
| NEBuffer 3.1                                      | New England Biolabs | B7203S      |
| 1M Tris-HCl pH 8.0                                | Invitrogen          | 15568025    |
| 5M NaCl RNase-free                                | Invitrogen          | AM9760G     |
| 1M MgCl <sub>2</sub>                              | Sigma               | M1028       |
| NP-40 Surfact-Amps Detergent Solution             | Thermo Scientific   | 28324       |
| GeneRuler Low Range DNA Ladder, ready-to-use      | Thermo Scientific   | SM1193      |
| Phusion Hot Start II High-Fidelity PCR master mix | Thermo Scientific   | F565L       |
| AMPure XP beads                                   | Beckman Coulter     | A63881      |
| QuickExtract DNA Extraction Solution              | Lucigen             | QE09050     |
| PBS                                               | Life Technologies   | 10010049    |
| UltraPure DNase/RNase-Free Distilled Water        | Invitrogen          | 10977023    |
| GelGreen Nucleic Acid Stain                       | Sigma               | SCT125      |
| QIAquick Gel Extraction Kit                       | Qiagen              | 28704       |
| Qubit dsDNA HS Assay Kit                          | Thermo Scientific   | Q32851      |
| NEBNext Library Quant Kit for Illumina            | New England Biolabs | E7630S      |
| MiSeq Reagent Kit v3, 150 cycles                  | Illumina            | MS-102-3001 |
| PhiX Control v3 Library                           | Illumina            | FC-110-3001 |
| Nextera XT Index Kit v2 Set A                     | Illumina            | FC-131-2001 |

Estimated costs of major enzymes and reagents:

| Reagent                                                   | Cost per $\mu\text{L}$ (\$) | Cost per plate (\$) |
|-----------------------------------------------------------|-----------------------------|---------------------|
| SuperScript IV Reverse Transcriptase                      | 8.540                       | 1229.76             |
| T4 DNA ligase                                             | 1.040                       | 299.52              |
| RNaseOUT Recombinant Ribonuclease Inhibitor               | 1.664                       | 239.62              |
| SUPERase In RNase Inhibitor                               | 0.970                       | 29.10               |
| dNTP                                                      | 0.065                       | 12.53               |
| Phusion Hot Start II High-Fidelity PCR master mix         | 0.035                       | 34.02               |
| AMPure XP beads                                           | 0.023                       | 23.91               |
| QuickExtract DNA Extraction Solution                      | 0.007                       | 7.01                |
| <b>Total cost per plate (\$)</b>                          |                             | 1875.46             |
| <b>Total cost per cell (when using 384 barcodes) (\$)</b> |                             | 0.003               |
